# Supplementary material for: Fabrication of magnetic trimetallic metal–organic frameworks for the rapid removal of tetracycline from water
Source: Royal Society of Chemistry journal article supplement (doi:10.1039/c9an02481f), 2020-01-01
Supplement: c9an02481f1.pdf [file c9an02481f1.pdf]

## Supporting Information

### **Fabrication of magnetic trimetallic metal–organic frameworks for rapid removal of tetracycline from water**

Rui Xiao <sup>a</sup>, Hassan Idris Abdu <sup>a</sup>, Liping Wei <sup>a</sup>, Tieying Wang <sup>a</sup>, Shuhui Huo <sup>a</sup>, Jing Chen <sup>a</sup>, Xiaoquan Lu <sup>a,b,\*</sup>

<sup>a</sup> Key Laboratory of Bioelectrochemistry & Environmental Analysis of Gansu Province, College of Chemistry & Chemical Engineering, Northwest Normal University, Lanzhou, Gansu 730070, China

<sup>b</sup> Tianjin Key Laboratory of Molecular Optoelectronics, Department of Chemistry, Tianjin University, Tianjin 300072, China

E-mail: [luxq@nwnu.edu.cn](mailto:luxq@nwnu.edu.cn); [luxq@tju.edu.cn](mailto:luxq@tju.edu.cn)

#### **Contents:**

|                                                 |             |
|-------------------------------------------------|-------------|
| <b>1. Adsorption Kinetics Study.....</b>        | <b>S-2</b>  |
| <b>2. Adsorption Equilibrium Isotherms.....</b> | <b>S-3</b>  |
| <b>3. Supplementary Figures .....</b>           | <b>S-4</b>  |
| <b>4. Supplementary Tables.....</b>             | <b>S-10</b> |
| <b>5. References.....</b>                       | <b>S-13</b> |

## 1. Adsorption Kinetics Study

The removal efficiency (%) of tetracycline is calculated as follows:

$$\text{Removal efficiency (\%)} = \frac{C_0 - C_t}{C_0} \times 100 \quad (1)$$

where  $C_0$  (mg/L) is the initial concentration of the tetracycline solution,  $C_t$  (mg/L) is the concentration of the tetracycline solution after adsorption.

The maximum amount adsorption was assessed using the following equation:

$$Q_t = \frac{(C_0 - C_t) \cdot V}{m} \quad (2)$$

Where  $Q_t$  (mg/g) is the maximum amount of tetracycline (mg) adsorbed by the sorbent at time  $t$ .  $C_0$  (mg/L) is the initial concentration of the Tc solution,  $C_t$  (mg/L) is the concentration of the tetracycline solution after adsorption.  $V$  (L) is the volume of contaminant stock solution.  $m$  (g) is the mass of sorbent used in the study.

The adsorbed amount at equilibrium was expressed by the following equation:

$$Q_e = \frac{(C_0 - C_e) \cdot V}{m} \quad (3)$$

Where  $Q_e$  (mg/g) is the amount of Tc (mg) adsorbed by the sorbent at equilibrium.  $C_0$  (mg/L) is the initial concentration of the Tc solution,  $C_e$  (mg/L) is the concentration of the tetracycline solution after adsorption.  $V$  (L) is the volume of pollutant stock solution.  $m$  (g) is the mass of sorbent used in the study.

The absorption rates of the two adsorbents were compared by the pseudo-second-order adsorption model of Ho and McKay (4) and the pseudo-first-order adsorption model of Lagergren (5). The linear equation can be expressed as:

$$\frac{t}{Q_t} = \frac{t}{Q_e} + \frac{t}{k_2 Q_e^2} \quad (4)$$

$$\log_{10}(Q_e - Q_t) = \log_{10}(Q_e) - \frac{k_1}{2.303} t \quad (5)$$

Where  $Q_t$  and  $Q_e$  are the adsorption capacity at time  $t$  (min) and at equilibrium, respectively.  $k_2$  and  $k_1$  ( $\text{g.mg}^{-1}.\text{min}^{-1}$ ) are the rate constants of pseudo-second-order and pseudo-first-order kinetic model, respectively. The relevant parameters are listed in Table S2.

## 2. Adsorption Equilibrium Isotherms

The Langmuir isotherm is assumed to be monolayer adsorption and all adsorption sites are identical, which can be expressed as:

$$\frac{C_e}{C_s} = \frac{1}{C_L \times C_{s, max}} + \frac{C_e}{C_{s, max}} \quad (6)$$

The Freundlich model is considered to be a multilayer adsorption with a distribution of different active sites. Usually expressed as:

$$\log C_s = \log K_F + \frac{1}{n} \log C_e \quad (7)$$

Where  $C_e$  (mg/L) is the concentration of Tc in the residue at the equilibrium of adsorption,  $C_s$  (mg/g) is the amount of Tc adsorbed per unit weight of adsorbent in equilibrium,  $C_{s, max}$  (mg/g) is the maximum adsorption capacity,  $K_L$  (L/mg) is the Langmuir constant, which is related to the heat of adsorption.  $K_F$  (mg<sup>1-n</sup> L<sup>n</sup>/g) and  $n$  both represent the adsorption equilibrium constant.

### 3. Supplementary Figures

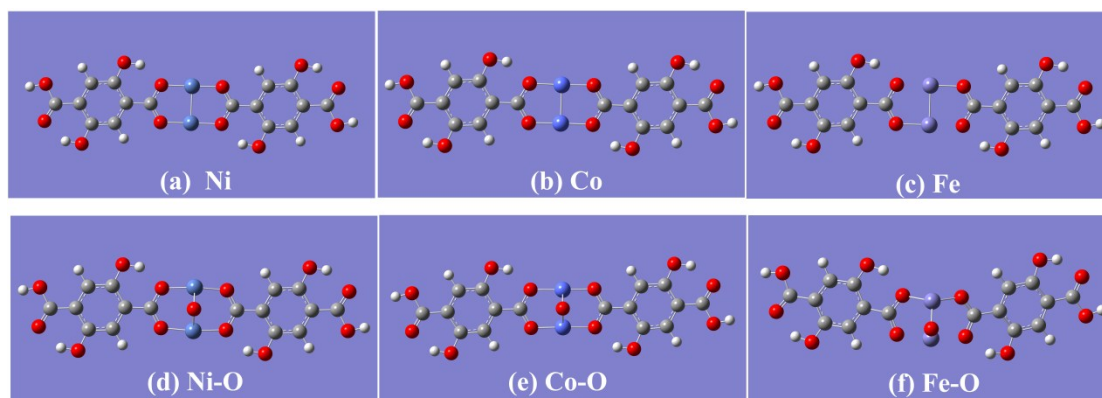

**Fig. S1** The minimum energy structures obtained by B3LYP 6-31G calculations for H<sub>4</sub>DOT-metals complexes (a, b, c). The minimum energy structures of three metals (Ni, Co, Fe) with the O atoms of organic ligands (d, e, f)

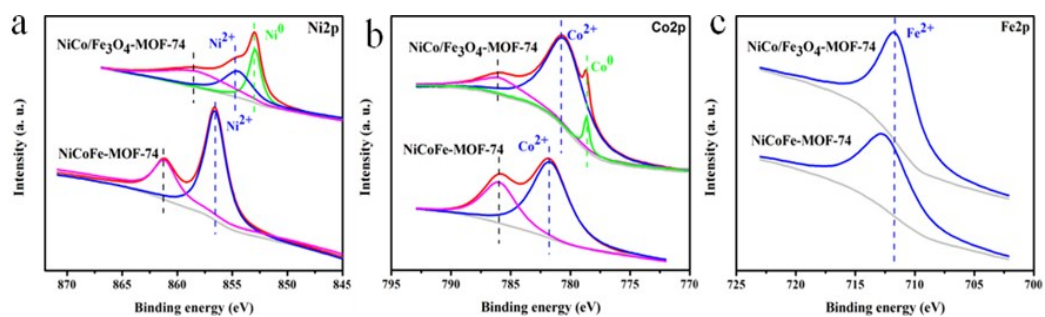

**Fig. S2** Ni 2p (a), Co 2p (b), Fe 2p (c) XPS spectra of NiCoFe-MOF-74 and NiCo/Fe<sub>3</sub>O<sub>4</sub>-MOF-74

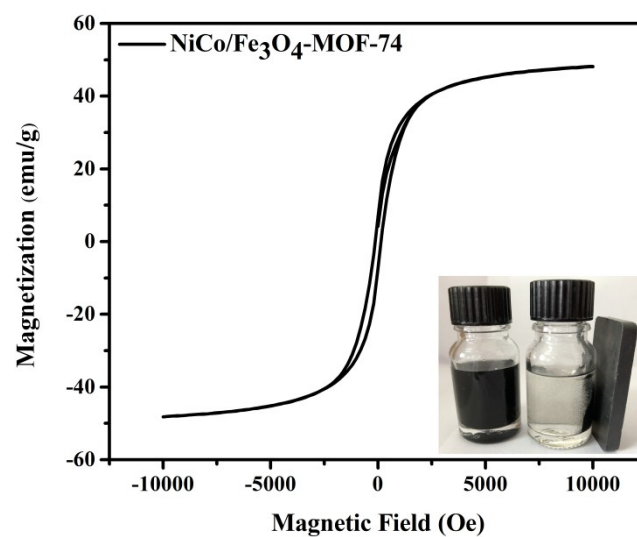

**Fig. S3** Vibrating sample magnetometric (VSM) magnetization curves of NiCo/Fe<sub>3</sub>O<sub>4</sub>-MOF-74.

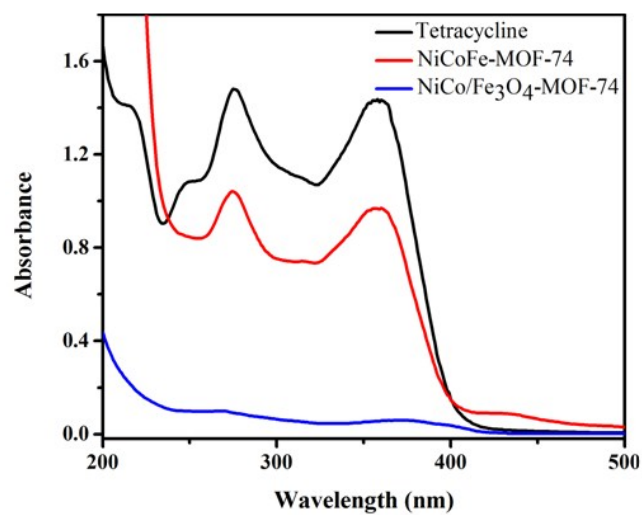

**Fig. S4** UV-vis absorbance of Tc (0.1 mM) and residual pollutant sorbed by NiCoFe-MOF-74 and NiCo/Fe<sub>3</sub>O<sub>4</sub>-MOF-74 at the same experimental conditions.



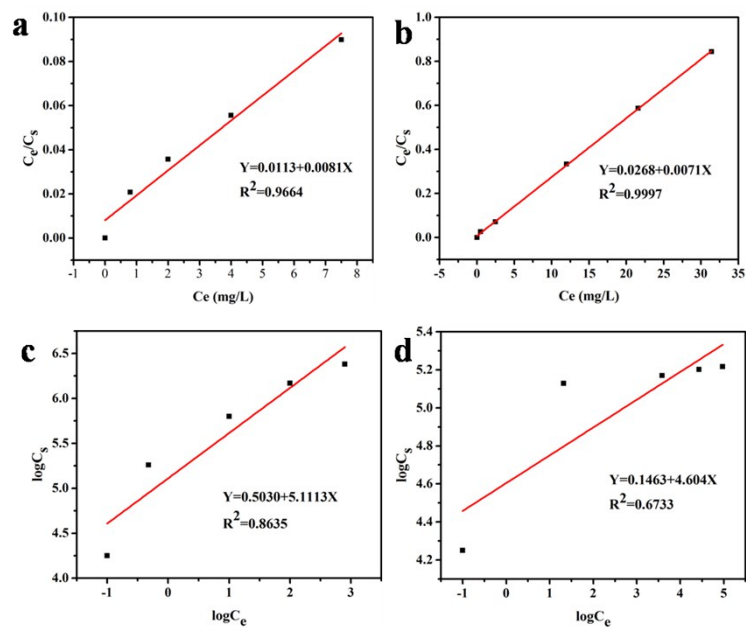

**Fig. S5** Analysis of Langmuir isotherm model for the adsorption of Tc with NiCo/Fe<sub>3</sub>O<sub>4</sub>-MOF-74 (a) and NiCoFe-MOF-74 (b). Freundlich isotherm model for the adsorption of Tc with NiCo/Fe<sub>3</sub>O<sub>4</sub>-MOF-74 (c) and NiCoFe-MOF-74 (d).

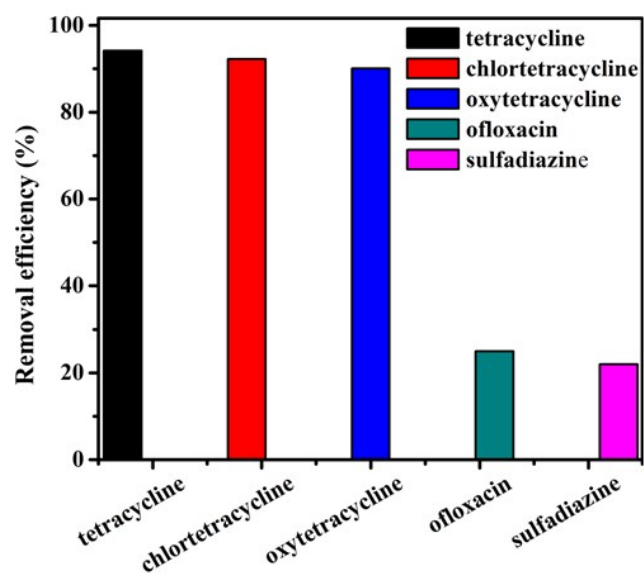

Fig. S6 The removal efficiency of NiCo/Fe<sub>3</sub>O<sub>4</sub>-MOF-74 to different antibiotics.

#### 4. Supplementary Tables

**Table S1** Adsorption energy of three metal atoms with oxygen atom

| Metal atoms | Pre-adsorption<br>energy (a.u.) | Post-adsorption<br>energy (a.u.) | Adsorption<br>energy (a.u.) | Adsorption<br>energy (eV) |
|-------------|---------------------------------|----------------------------------|-----------------------------|---------------------------|
| Ni          | -1857.18                        | -1932.35                         | -0.21                       | -5.78                     |
| Co          | -1808.62                        | -1883.87                         | -0.29                       | -7.81                     |
| Fe          | -1765.29                        | -1840.56                         | -0.31                       | -8.42                     |

Oxygen atom energy: -74.96 (a.u.)

**Table S2** Adsorption Kinetics parameters for Tc

| Adsorbents                                  | pseudo-first-order    |                                          |        | pseudo-second-order   |                                          |        |
|---------------------------------------------|-----------------------|------------------------------------------|--------|-----------------------|------------------------------------------|--------|
|                                             | $Q_{1,cal}$           | $k_1$                                    | $R^2$  | $Q_{2,cal}$           | $k_2$                                    | $R^2$  |
|                                             | (mg.g <sup>-1</sup> ) | (g.mg <sup>-1</sup> .min <sup>-1</sup> ) |        | (mg.g <sup>-1</sup> ) | (g.mg <sup>-1</sup> .min <sup>-1</sup> ) |        |
| NiCoFe-MOF-74                               | 39.14                 | 0.224                                    | 0.5673 | 33.27                 | 0.317                                    | 0.9938 |
| NiCo/Fe <sub>3</sub> O <sub>4</sub> -MOF-74 | 91.66                 | 0.486                                    | 0.8648 | 85.47                 | 0.024                                    | 0.9994 |

**Table S3** Adsorption isotherms parameters for Tc

| Adsorbents                                  | Langmuir                |                 |        | Freundlich |                                                   |        |
|---------------------------------------------|-------------------------|-----------------|--------|------------|---------------------------------------------------|--------|
|                                             | $C_{s, \max}$<br>(mg/g) | $K_L$<br>(L/mg) | $R^2$  | n          | $K_F$<br>( $\text{mg}^{1-n}\text{L}^n/\text{g}$ ) | $R^2$  |
| NiCoFe-MOF-74                               | 44.35                   | 1.503           | 0.9997 | 2.6364     | 24.74                                             | 0.6733 |
| NiCo/Fe <sub>3</sub> O <sub>4</sub> -MOF-74 | 102.94                  | 0.5714          | 0.9664 | 1.5625     | 23.00                                             | 0.8635 |

## 5. References

- (1) Ho, Y.; McKay, G. Pseudo-second Order Model for Sorption Processes. *Process biochem.* **1999**, 34, 451–465.
- (2) Lagergren, S. About the Theory of so-called Adsorption of Soluble Substances. *Handl.* **1898**, 24, 1–39.
- (3) Saunders, D. L.; Pecsok, R. L. Calculation of Distribution Coefficients in Inorganic Gel Chromatography. *Anal. Chem.* **1968**, 40, 44–48.
- (4) Umpleby, R. J.; Baxter, S. C.; Chen, Y.; Shah, R. N.; Shimizu, K. D. Characterization of Molecularly Imprinted Polymers with the Langmuir–Freundlich Isotherm. *Anal. Chem.* **2001**, 73, 4584–4591.
- (5) Liu, Q.; Zhong, L. B.; Zhao, Q. B.; Frear, C.; Zheng, Y. M. Synthesis of Fe<sub>3</sub>O<sub>4</sub>/Polyacrylonitrile Composite Electrospun Nanofiber Mat for Effective Adsorption of Tetracycline. *ACS Appl. Mater. Interfaces* **2015**, 7, 14573–14583.
- (6) Dong, H. R.; Jiang, Z.; Zhang, C.; Deng, J. M.; Hou, K. J.; Cheng, Y. J.; Lihua Zhang, L. H.; Zeng, G. M. Removal of Tetracycline by Fe/Ni Bimetallic Nanoparticles in Aqueous Solution. *J Colloid. Interface Sci.* **2018**, 513, 117–125.
